# Supplementary material
Source: PubMed Central journal article supplement (PMC8892938)
Supplement: NIHMS1780411-supplement-supplement.pdf [file NIHMS1780411-supplement-supplement.pdf]

## Supplemental Online Content

Brooks JT, Butler JC. Effectiveness of Mask Wearing to Control Community Spread of SARS-Cov-2. *JAMA*. Published online February 8, 2021. doi:10.1001/jama.2021.1505

**Supplement.** eTable. Summary of studies that have assessed the effect of mask mandates on SARS-Cov-2 infection risk

This supplemental material has been provided by the authors to give readers additional information about their work.

eTable: Summary of studies that have assessed the effect of mask mandates on SARS-Cov-2 infection risk

|                          | Type of investigation                             | Location                                 | Study months (all 2020) | Population studied                                              | Intervention                                                                                           | Outcome                                                                                                                         |
|--------------------------|---------------------------------------------------|------------------------------------------|-------------------------|-----------------------------------------------------------------|--------------------------------------------------------------------------------------------------------|---------------------------------------------------------------------------------------------------------------------------------|
| Hendrix <sup>1</sup>     | Cohort study                                      | Hair salon in Springfield, Missouri, USA | May                     | 139 patrons at a salon with 2 infected and symptomatic stylists | Universal mask wearing in salon (by local ordinance and company policy)                                | No COVID-19 infections among 67 patrons who were available for follow-up                                                        |
| Payne <sup>2</sup>       | Cohort study                                      | USS Theodore Roosevelt, Guam, USA        | March                   | 382 U.S. Navy service members                                   | Mask wearing (self-report)                                                                             | Mask wearing reduced risk of infection by 70% (unadjusted OR 0.30 [95% CI, 0.17-0.52])                                          |
| Wang Y <sup>3</sup>      | Cohort study                                      | Households in Beijing, China             | February-March          | 124 households of diagnosed cases comprising 335 people         | Mask wearing by index cases or $\geq 1$ household member prior to index case's diagnosis (self-report) | Mask wearing reduced risk of secondary infection risk by 79% (adjusted OR 0.23 [95% CI, 0.06-0.79])                             |
| Doung-ngern <sup>4</sup> | Case-control study                                | Bangkok, Thailand                        | April-May               | 839 close contacts of 211 index cases                           | Mask wearing by contact at time of high-risk exposure to case (self-report)                            | Always having used a mask reduced infection by 77% (adjusted OR 0.23 [95% CI, 0.09-0.60])                                       |
| Galloway <sup>5</sup>    | Population-based intervention                     | Arizona state, USA                       | January-August          | State population                                                | Mandatory mask wearing in public                                                                       | Temporal association between institution of masking policy and subsequent decline in new diagnoses.                             |
| Rader <sup>6</sup>       | Serial cross-sectional surveys                    | United States                            | June-July               | 374,021 persons who completed web-based surveys                 | Self-reported mask wearing in grocery stores and in the homes of family or friends                     | A 10% increase in mask wearing tripled the likelihood of stopping community transmission (adjusted OR 3.53 [95% CI, 2.03-6.43]) |
| Wang X <sup>7</sup>      | Population-based intervention with trend analysis | Boston, Massachusetts                    | March-April             | 9,850 healthcare workers (HCW)                                  | Universal masking of HCW and patients, Mass General Brigham health care system                         | Estimated weekly decline in new diagnoses among HCW of 3.4% after implementation of the mask wearing policy                     |
| Mitze <sup>8</sup>       | Population-based intervention with trend analysis | Jena, Thuringia state, Germany           | April                   | City population aged $\geq 15$ years                            | Mandatory mask wearing in public spaces (e.g., public transport, shops)                                | Estimated daily decline in new diagnoses of 1.32% after implementation of the mask wearing policy                               |

|                             |                                                   |                                |              |                    |                                         |                                                                                                                         |
|-----------------------------|---------------------------------------------------|--------------------------------|--------------|--------------------|-----------------------------------------|-------------------------------------------------------------------------------------------------------------------------|
| Van Dyke <sup>9</sup>       | Population-based intervention with trend analysis | Kansas state, USA              | June-August  | State population   | Mandatory mask wearing in public spaces | Estimated case rate per 100,000 decreased by 0.08 in counties with mask mandates but increased by 0.11 in those without |
| Lyu and Wehby <sup>10</sup> | Population-based intervention with trend analysis | 15 US states and Washington DC | March-May    | State populations  | Mandatory mask wearing in public        | Estimated overall initial daily decline in new diagnoses of 0.9% grew to 2.0% at 21 days following mandates             |
| Karaivanov <sup>11</sup>    | Counterfactual modeling using national data       | Canada                         | March-August | Country population | Mandatory mask wearing indoors          | Estimated weekly 25%-40% decline in new diagnoses following mask mandates                                               |

\*OR = odds ratio.

- Hendrix MJ, Walde C, Findley K, Trotman R. Absence of Apparent Transmission of SARS-CoV-2 from Two Stylists After Exposure at a Hair Salon with a Universal Face Covering Policy - Springfield, Missouri, May 2020. *MMWR Morb Mortal Wkly Rep.* 2020;69(28):930-932.10.15585/mmwr.mm6928e2. <https://www.ncbi.nlm.nih.gov/pubmed/32673300>.
- Payne DC, Smith-Jeffcoat SE, Nowak G, et al. SARS-CoV-2 Infections and Serologic Responses from a Sample of U.S. Navy Service Members - USS Theodore Roosevelt, April 2020. *MMWR Morb Mortal Wkly Rep.* 2020;69(23):714-721.10.15585/mmwr.mm6923e4. <https://www.ncbi.nlm.nih.gov/pubmed/32525850>.
- Wang Y, Tian H, Zhang L, et al. Reduction of secondary transmission of SARS-CoV-2 in households by face mask use, disinfection and social distancing: a cohort study in Beijing, China. *BMJ Glob Health.* 2020;5(5).10.1136/bmjgh-2020-002794. <https://www.ncbi.nlm.nih.gov/pubmed/32467353>.
- Doung-Ngern P, Suphanchaimat R, Panjangampattana A, et al. Case-Control Study of Use of Personal Protective Measures and Risk for Severe Acute Respiratory Syndrome Coronavirus 2 Infection, Thailand. *Emerg Infect Dis.* 2020;26(11).10.3201/eid2611.203003. <https://www.ncbi.nlm.nih.gov/pubmed/32931726>.
- Gallaway MS, Rigler J, Robinson S, et al. Trends in COVID-19 Incidence After Implementation of Mitigation Measures - Arizona, January 22-August 7, 2020. *MMWR Morb Mortal Wkly Rep.* 2020;69(40):1460-1463.10.15585/mmwr.mm6940e3. <https://www.ncbi.nlm.nih.gov/pubmed/33031366>.
- Rader B, White LF, Burns MR, et al. Mask-wearing and control of SARS-CoV-2 transmission in the USA: a cross-sectional study. *The Lancet Digital Health.* 2021. [https://doi.org/10.1016/S2589-7500\(20\)30293-4](https://doi.org/10.1016/S2589-7500(20)30293-4). <http://www.sciencedirect.com/science/article/pii/S2589750020302934>.
- Wang X, Ferro EG, Zhou G, Hashimoto D, Bhatt DL. Association Between Universal Masking in a Health Care System and SARS-CoV-2 Positivity Among Health Care Workers. *JAMA.* 2020.10.1001/jama.2020.12897. <https://www.ncbi.nlm.nih.gov/pubmed/32663246>.

8. Mitze T., Kosfeld R., Rode J., Wälde K. *Face Masks Considerably Reduce COVID-19 Cases in Germany: A Synthetic Control Method Approach*. IZA – Institute of Labor Economics (Germany);2020.ISSN: 2365-9793, DP No. 13319. <http://ftp.iza.org/dp13319.pdf>.
9. Van Dyke ME, Rogers TM, Pevzner E, et al. Trends in County-Level COVID-19 Incidence in Counties With and Without a Mask Mandate - Kansas, June 1-August 23, 2020. *MMWR Morb Mortal Wkly Rep*. 2020;69(47):1777-1781.10.15585/mmwr.mm6947e2. <https://www.ncbi.nlm.nih.gov/pubmed/33237889>.
10. Lyu W, Wehby GL. Community Use Of Face Masks And COVID-19: Evidence From A Natural Experiment Of State Mandates In The US. *Health Aff (Millwood)*. 2020;39(8):1419-1425.10.1377/hlthaff.2020.00818. <https://www.ncbi.nlm.nih.gov/pubmed/32543923>.
11. Karaivanov A., Lu S.E., Shigeoka H., Chen C., Pamplona S. *Face Masks, Public Policies And Slowing The Spread Of Covid-19: Evidence from Canada*. National Bureau Of Economic Research 2020.Working Paper 27891. <http://www.nber.org/papers/w27891>.
